# Supplementary material
Source: MDPI journal article supplement (https://www.mdpi.com/2077-0472/8/7/112)
Supplement: s1 [file s1]

**Table S1.** Typology of the regions of origin of cultivated vegetable species

|                         | Europe to<br>Central<br>Asia<br>(N=184) | Americas<br>(N=240) | Africa<br>(N=160) | Asia<br>Pacific<br>(N=407) | Wide<br>ranging<br>(N=106) |
|-------------------------|-----------------------------------------|---------------------|-------------------|----------------------------|----------------------------|
| South America           |                                         | 61%                 |                   |                            | 16%                        |
| Central America         |                                         | 49%                 |                   |                            | 11%                        |
| North America           |                                         | 19%                 |                   |                            | 8%                         |
| Africa                  |                                         |                     | 100%              |                            | 68%                        |
| Mediterranean           | 51%                                     |                     |                   |                            | 19%                        |
| Near East               | 17%                                     |                     |                   |                            | 19%                        |
| Hindustan               |                                         |                     |                   | 29%                        | 48%                        |
| South east Asia         |                                         |                     |                   | 63%                        | 43%                        |
| Australia & the Pacific |                                         |                     |                   | 16%                        | 27%                        |
| Chinese Japanese        |                                         |                     |                   | 26%                        | 24%                        |
| Central Asia            | 20                                      |                     |                   |                            | 10%                        |
| Europe Siberia          | 42                                      |                     |                   |                            | 19%                        |
