# Supplementary material
Source: MDPI journal article supplement (https://www.mdpi.com/2077-0472/8/7/112)
Supplement: s1 [file s1]

**Table S3.** Cultivated vegetable species with no accessions in ex situ collections

| Family                           | Genus                                              | Region of origin |
|----------------------------------|----------------------------------------------------|------------------|
| <b>Fruit and Seed Vegetables</b> |                                                    |                  |
| Cucurbitaceae                    | <i>Trichosanthes japonica</i> Regel                | Asia             |
| Cucurbitaceae                    | <i>Trichosanthes pilosa</i> Lour.                  | Asia             |
| Cucurbitaceae                    | <i>Sechium tacaco</i> (Pittier) C. Jeffrey         | Americas         |
| Rutaceae                         | <i>Citrus lucida</i> (Scheff.) Mabb.               | Asia             |
| Musaceae                         | <i>Musa troglodytarum</i> L.                       | Asia             |
| Areaceae                         | <i>Pritchardia martii</i> (Gaudich.) H.Wendl.      | Asia             |
| Leguminosae                      | <i>Dialium indum</i> L.                            | Asia             |
| Leguminosae                      | <i>Dialium ovoideum</i> Thwaites                   | Asia             |
| Leguminosae                      | <i>Parkia intermedia</i> Hassk.                    | Asia             |
| Leguminosae                      | <i>Inga ilta</i> T.D.Penn.                         | Americas         |
| Leguminosae                      | <i>Archidendron jiringa</i> (Jack) I.C.Nielsen     | Asia             |
| Leguminosae                      | <i>Canavalia plagiosperma</i> Piper                | Americas         |
| Leguminosae                      | <i>Canavalia macrobotrys</i> Merr.                 | Asia             |
| <b>Other vegetables</b>          |                                                    |                  |
| Euphorbiaceae                    | <i>Euphorbia balsamifera</i> Aiton                 | Africa           |
| Apocynaceae                      | <i>Fernaldia pandurata</i> (A.DC.) Woodson         | Americas         |
| Acanthaceae                      | <i>Dicliptera falcata</i> (Lam.) Bosser & Heine    | Asia             |
| Acanthaceae                      | <i>Dicliptera papuana</i> Warb.                    | Asia             |
| Compositae                       | <i>Philoglossa peruviana</i> DC.                   | Americas         |
| Compositae                       | <i>Solanecio biafrae</i> (Oliv. & Hiern) C.Jeffrey | Africa           |
| Compositae                       | <i>Enydra fluctuans</i> DC.                        | Africa           |
| Asparagaceae                     | <i>Dracaena cochinchinensis</i> (Lour.) S.C.Chen   | Asia             |
| Asparagaceae                     | <i>Yucca gigantea</i> Lem.                         | Americas         |
| Asparagaceae                     | <i>Agave cantala</i> (Haw.) Roxb. ex Salm-Dyck     | Americas         |
| Haloragaceae                     | <i>Myriophyllum aquaticum</i> (Vell.) Verdc.       | Wide ranging     |
| Meliaceae                        | <i>Toona sureni</i> (Blume) Merr.                  | Asia             |
| Rutaceae                         | <i>Zanthoxylum oxyphyllum</i> Edgew.               | Asia             |
| Polygonaceae                     | <i>Reynoutria japonica</i> Houtt.                  | Asia             |
| Rosaceae                         | <i>Filipendula multijuga</i> Maxim.                | Asia             |
| Zingiberaceae                    | <i>Aframomum citratum</i> (C.Pereira) K.Schum.     | Africa           |
| Zingiberaceae                    | <i>Amomum compactum</i> Sol. ex Maton              | Asia             |
| Commelinaceae                    | <i>Belosynapsis moluccana</i> (Roxb.) C.E.C.Fisch. | Asia             |
| Areaceae                         | <i>Eugeissona utilis</i> Becc.                     | Asia             |
| Areaceae                         | <i>Metroxylon sagu</i> Rottb.                      | Asia             |
| Areaceae                         | <i>Daemonorops jenkinsiana</i> (Griff.) Mart.      | Asia             |
| Areaceae                         | <i>Calamus egregius</i> Burret                     | Asia             |
| Areaceae                         | <i>Calamus scipionum</i> Lour.                     | Asia             |
| Areaceae                         | <i>Calamus simplicifolius</i> C.F.Wei              | Asia             |
| Areaceae                         | <i>Dypsis baronii</i> (Becc.) Beentje & J.Dransf.  | Africa           |
| Areaceae                         | <i>Oenocarpus mapora</i> H.Karst.                  | Americas         |
| Areaceae                         | <i>Astrocaryum chambira</i> Burret                 | Americas         |
| Leguminosae                      | <i>Erythrina falcata</i> Benth.                    | Americas         |
| <b>Leafy vegetables</b>          |                                                    |                  |
| Polygalaceae                     | <i>Carpolobia lutea</i> G.Don                      | Africa           |
| Vitaceae                         | <i>Cissus repens</i> Lam.                          | Asia             |
| Vitaceae                         | <i>Cissus javana</i> DC.                           | Asia             |
| Phyllanthaceae                   | <i>Glochidion rubrum</i> Blume                     | Asia             |
| Peraceae                         | <i>Trigonopleura malayana</i> Hook.f.              | Asia             |
| Euphorbiaceae                    | <i>Erythrococca atrovirens</i> (Pax) Prain         | Africa           |

|                    |                                                      |                  |
|--------------------|------------------------------------------------------|------------------|
| Euphorbiaceae      | <i>Claoxylon indicum</i> (Reinw. ex Blume) Hassk.    | Asia             |
| Euphorbiaceae      | <i>Claoxylon longifolium</i> (Blume) Endl. ex Hassk. | Asia             |
| Euphorbiaceae      | <i>Acalypha caturus</i> Blume                        | Asia             |
| Euphorbiaceae      | <i>Acalypha paniculata</i> Miq.                      | Wide ranging     |
| Euphorbiaceae      | <i>Plukenetia corniculata</i> Sm.                    | Asia             |
| Euphorbiaceae      | <i>Euphorbia neriifolia</i> L.                       | Asia             |
| Araliaceae         | <i>Trevesia sundaica</i> Miq.                        | Asia             |
| Araliaceae         | <i>Polyscias verticillata</i> B.C.Stone              | Asia             |
| Araliaceae         | <i>Polyscias scutellaria</i> (Burm.f.) Fosberg       | Asia             |
| Araliaceae         | <i>Polyscias cumingiana</i> (C.Presl) Fern.-Vill.    | Asia             |
| Apiaceae           | <i>Eryngium aquaticum</i> L.                         | Americas         |
| Apiaceae           | <i>Pimpinella calycina</i> Maxim.                    | Asia             |
| Apiaceae           | <i>Angelica japonica</i> A.Gray                      | Asia             |
| Clusiaceae         | <i>Garcinia cowa</i> Roxb. ex Choisy                 | Asia             |
| Clusiaceae         | <i>Garcinia sisygiifolia</i> Pierre                  | Asia             |
| Achariaceae        | <i>Pangium edule</i> Reinw.                          | Asia             |
| Caricaceae         | <i>Carica monoica</i> Desf.                          | Americas         |
| Capparaceae        | <i>Cleoserrata speciosa</i> (Raf.) Iltis             | Americas         |
| Brassicaceae       | <i>Pugionium cornutum</i> (L.) Gaertn.               | Europe to C Asia |
| Cucurbitaceae      | <i>Momordica cissoides</i> Planch. ex Benth.         | Africa           |
| Cucurbitaceae      | <i>Trichosanthes villosa</i> Blume                   | Asia             |
| Malvaceae          | <i>Pachira sessilis</i> Benth.                       | Americas         |
| Malvaceae          | <i>Pachira glabra</i> Pasq.                          | Wide ranging     |
| Malvaceae          | <i>Pavonia odorata</i> Willd.                        | Asia             |
| Symplocaceae       | <i>Symplocos odoratissima</i> Choisy ex Zoll.        | Asia             |
| Primulaceae        | <i>Maesa latifolia</i> A.DC.                         | Asia             |
| Apocynaceae        | <i>Hoya reticulata</i> Moon                          | Asia             |
| Rubiaceae          | <i>Mussaenda glabra</i> Vahl                         | Asia             |
| Rubiaceae          | <i>Mussaenda roxburghii</i> Hook.f.                  | Asia             |
| Solanaceae         | <i>Solanum wendlandii</i> Hook. f.                   | Americas         |
| Plantaginaceae     | <i>Limnophila aromatica</i> (Lam.) Merr.             | Asia             |
| Bignoniaceae       | <i>Mayodendron igneum</i> (Kurz) Kurz                | Asia             |
| Acanthaceae        | <i>Staurogyne elongata</i> Kuntze                    | Asia             |
| Acanthaceae        | <i>Pseuderanthemum racemosum</i> Radlk.              | Asia             |
| Acanthaceae        | <i>Asystasia vogeliana</i> Benth.                    | Africa           |
| Acanthaceae        | <i>Rungia klossii</i> S.Moore                        | Asia             |
| Acanthaceae        | <i>Clinacanthus nutans</i> (Burm.f.) Lindau          | Asia             |
| Acanthaceae        | <i>Justicia insularis</i> T.Anderson                 | Africa           |
| Lamiaceae          | <i>Premna mollissima</i> Roth                        | Asia             |
| Lamiaceae          | <i>Clerodendrum minahassae</i> Teijsm. & Binn.       | Asia             |
| Lamiaceae          | <i>Clerodendrum petasites</i> (Lour.) S.Moore        | Asia             |
| Pentaphragmataceae | <i>Pentaphragma begoniifolia</i> Wall. ex G. Don     | Asia             |
| Compositae         | <i>Baccharoides calvoana</i> (Hook.f.) \             | Africa           |
| Compositae         | <i>Artemisia indica</i> Willd.                       | Asia             |
| Compositae         | <i>Emilia praetermissa</i> Milne-Redh.               | Africa           |
| Compositae         | <i>Gynura amplexicaulis</i> Oliv. & Hiern            | Africa           |
| Compositae         | <i>Gynura procumbens</i> (Lour.) Merr.               | Africa           |
| Compositae         | <i>Bidens triplinervia</i> Kunth                     | Americas         |
| Compositae         | <i>Mikania micrantha</i> Kunth                       | Americas         |
| Dioscoreaceae      | <i>Dioscorea mangelotiana</i> J.Miège                | Africa           |
| Smilacaceae        | <i>Smilax china</i> L.                               | Asia             |
| Asparagaceae       | <i>Dracaena aubryana</i> Brongn. ex E.Morren         | Africa           |
| Amaryllidaceae     | <i>Allium consanguineum</i> Kunth                    | Asia             |

|                            |                                                            |              |
|----------------------------|------------------------------------------------------------|--------------|
| Myrtaceae                  | <i>Syzygium polycephalum</i> (Miq.) Merr. & L.M.Perry      | Asia         |
| Melastomataceae            | <i>Dichaetanthera corymbosa</i> Jacq.-Fél.                 | Africa       |
| Anacardiaceae              | <i>Mangifera kemanga</i> Blume                             | Asia         |
| Anacardiaceae              | <i>Semecarpus cassuvium</i> Roxb.                          | Asia         |
| Sapindaceae                | <i>Cubilia cubili</i> (Blanco) Adelb.                      | Asia         |
| Sapindaceae                | <i>Lepisanthes rubiginosa</i> (Roxb.) Leenh.               | Asia         |
| Osmundaceae                | <i>Osmundastrum cinnamomeum</i> (L.) C. Presl              | Asia         |
| Athyriaceae                | <i>Diplazium esculentum</i> (Retz.) Sw.                    | Asia         |
| Pteridaceae                | <i>Ceratopteris cornuta</i> (P. Beauv.) Lepr.              | Wide ranging |
| Cyatheaceae                | <i>Cyathea angiensis</i> (A. Gepp) Domin                   | Asia         |
| Gnetaceae                  | <i>Gnetum buchholzianum</i> Engl.                          | Asia         |
| Piperaceae                 | <i>Piper auritum</i> Kunth                                 | Americas     |
| Nymphaeaceae               | <i>Nuphar japonica</i> DC.                                 | Asia         |
| Cabombaceae                | <i>Brasenia schreberi</i> J.F.Gmel.                        | Asia         |
| Papaveraceae               | <i>Corydalis turtschaninovii</i> Besser                    | Asia         |
| Phytolaccaceae             | <i>Phytolacca esculenta</i> Van Houtte                     | Asia         |
| Aizoaceae                  | <i>Mesembryanthemum cordifolium</i> L.f.                   | Africa       |
| Cactaceae                  | <i>Pereskia grandifolia</i> Haw.                           | Americas     |
| Cactaceae                  | <i>Pereskia sacharosa</i> Griseb.                          | Americas     |
| Cactaceae                  | <i>Opuntia atropes</i> Rose                                | Americas     |
| Cactaceae                  | <i>Opuntia maxima</i> Mill.                                | Americas     |
| Cactaceae                  | <i>Cereus repandus</i> (L.) Mill.                          | Americas     |
| Amaranthaceae              | <i>Salsola komarovii</i> Iljin                             | Asia         |
| Amaranthaceae              | <i>Alternanthera philoxeroides</i> (Mart.) Griseb.         | Americas     |
| Polygonaceae               | <i>Persicaria barbata</i> (L.) H.Hara                      | Wide ranging |
| Polygonaceae               | <i>Polygonum odoratum</i> Lour.                            | Asia         |
| Polygonaceae               | <i>Persicaria pulchra</i> (Blume) Soják                    | Wide ranging |
| Polygonaceae               | <i>Fagopyrum kashmirianum</i> Munshi                       | Asia         |
| Moraceae                   | <i>Ficus annulata</i> Blume                                | Asia         |
| Moraceae                   | <i>Ficus dammaropsis</i> Diels                             | Asia         |
| Urticaceae                 | <i>Laportea aestuans</i> (L.) Chew                         | Wide ranging |
| Urticaceae                 | <i>Urera trinervis</i> (Hochst.) Friis & Immelman          | Africa       |
| Urticaceae                 | <i>Pilea melastomoides</i> (Poir.) Wedd.                   | Asia         |
| Crassulaceae               | <i>Sedum sarmentosum</i> Bunge                             | Asia         |
| Araceae                    | <i>Lasiorhiza senegalensis</i> Schott                      | Africa       |
| Araceae                    | <i>Lasia spinosa</i> (L.) Thwaites                         | Asia         |
| Araceae                    | <i>Caladium bicolor</i> (Aiton) Vent.                      | Americas     |
| Araceae                    | <i>Colocasia fallax</i> Schott                             | Asia         |
| Araceae                    | <i>Alocasia odora</i> (Lindl.) K.Koch                      | Wide ranging |
| Araceae                    | <i>Wolffia arrhiza</i> (L.) Horkel ex Wimm.                | Wide ranging |
| Araceae                    | <i>Wolffia globosa</i> (Roxb.) Hartog & Plas               | Wide ranging |
| Hydrocharitaceae           | <i>Ottelia alismoides</i> (L.) Pers.                       | Asia         |
| Hydrocharitaceae           | <i>Vallisneria natans</i> (Lour.) H.Hara                   | Asia         |
| Pontederiaceae             | <i>Monochoria korsakowii</i> Regel & Maack                 | Wide ranging |
| Musaceae                   | <i>Musa salaccensis</i> Zoll. ex Backer                    | Asia         |
| Zingiberaceae              | <i>Riedelia corallina</i> (K.Schum.) Valetton              | Asia         |
| Commelinaceae              | <i>Commelina cyanea</i> R.Br.                              | Asia         |
| Arecaceae                  | <i>Caryota maxima</i> Blume ex Mart.                       | Asia         |
| Leguminosae                | <i>Pterocarpus mildbraedii</i> Harms                       | Africa       |
| Leguminosae                | <i>Erythrina subumbrans</i> (Hassk.) Merr.                 | Asia         |
| Leguminosae                | <i>Nesphostylis bracteata</i> (Baker) D.Potter & J.J.Doyle | Asia         |
| <b>Multiuse vegetables</b> |                                                            |              |

|                        |                                                            |                  |
|------------------------|------------------------------------------------------------|------------------|
| Vitaceae               | <i>Cissus gongylodes</i> (Baker) Burch. ex Baker           | Americas         |
| Opiliaceae             | <i>Melientha suavis</i> Pierre                             | Asia             |
| Euphorbiaceae          | <i>Plukenetia conophora</i> Müll.Arg.                      | Africa           |
| Araliaceae             | <i>Polyscias fruticosa</i> (L.) Harms                      | Asia             |
| Apocynaceae            | <i>Vallaris solanacea</i> (Roth) Kuntze                    | Asia             |
| Apocynaceae            | <i>Morrenia odorata</i> (Hook. & Arn.) Lindl.              | Americas         |
| Apocynaceae            | <i>Telosma procumbens</i> (Blanco) Merr.                   | Asia             |
| Lamiaceae              | <i>Rotheca serrata</i> (L.) Steane & Mabb.                 | Asia             |
| Lamiaceae              | <i>Plectranthus rotundifolius</i> (Poir.) Spreng.          | Africa           |
| Compositae             | <i>Petasites japonicus</i> (Siebold & Zucc.) Maxim.        | Asia             |
| Compositae             | <i>Gynura pseudochina</i> (L.) DC.                         | Africa           |
| Compositae             | <i>Pluchea indica</i> (L.) Less.                           | Asia             |
| Stemonaceae            | <i>Stemona tuberosa</i> Lour.                              | Asia             |
| Asparagaceae           | <i>Dracaena angustifolia</i> (Medik.) Roxb.                | Asia             |
| Asparagaceae           | <i>Polianthes tuberosa</i> L.                              | Americas         |
| Amaryllidaceae         | <i>Allium longifolium</i> (Kunth) Spreng.                  | Asia             |
| Myrtaceae              | <i>Syzygium formosum</i> (Wall.) Masam.                    | Asia             |
| Anacardiaceae          | <i>Dracontomelon dao</i> (Blanco) Merr. & Rolfe            | Asia             |
| Burseraceae            | <i>Boswellia serrata</i> Roxb. ex Colebr.                  | Asia             |
| Oxalidaceae            | <i>Oxalis debilis</i> Kunth                                | Asia             |
| Gnetaceae              | <i>Gnetum gnemon</i> L.                                    | Asia             |
| Nymphaeaceae           | <i>Nymphaea lotus</i> L.                                   | Africa           |
| Cactaceae              | <i>Opuntia tuna</i> (L.) Mill.                             | Americas         |
| Moraceae               | <i>Broussonetia luzonica</i> (Blanco) Bureau               | Asia             |
| Araceae                | <i>Amorphophallus kachinensis</i> Engl. & Gehrm.           | Asia             |
| Araceae                | <i>Amorphophallus harmandii</i> Engl. & Gehrm.             | Asia             |
| Araceae                | <i>Amorphophallus krausei</i> Engl.                        | Asia             |
| Araceae                | <i>Amorphophallus yuloensis</i> H.Li                       | Asia             |
| Araceae                | <i>Schismatoglottis calyptrata</i> (Roxb.) Zoll. & Moritzi | Asia             |
| Araceae                | <i>Alocasia portei</i> Schott                              | Asia             |
| Aponogetonaceae        | <i>Aponogeton distachyos</i> L.f.                          | Africa           |
| Hydrocharitaceae       | <i>Hydrocharis dubia</i> (Blume) Backer                    | Asia             |
| Bromeliaceae           | <i>Bromelia serra</i> Griseb.                              | Americas         |
| Zingiberaceae          | <i>Curcuma mangga</i> Valetton & Zijp                      | Asia             |
| Zingiberaceae          | <i>Curcuma purpurascens</i> Blume                          | Asia             |
| Zingiberaceae          | <i>Curcuma zanthorrhiza</i> Roxb.                          | Asia             |
| Zingiberaceae          | <i>Amomum maximum</i> Roxb.                                | Asia             |
| Pandanaceae            | <i>Pandanus utilis</i> Bory                                | Africa           |
| Leguminosae            | <i>Parkia speciosa</i> Hassk.                              | Asia             |
| Leguminosae            | <i>Flemingia tuberosa</i> Dalzell                          | Asia             |
| <b>Root vegetables</b> |                                                            |                  |
| Schoepfiaceae          | <i>Arjona tuberosa</i> Cav.                                | Americas         |
| Euphorbiaceae          | <i>Manihot grahamii</i> Hook.                              | Americas         |
| Euphorbiaceae          | <i>Manihot brachyandra</i> Pax & K.Hoffm.                  | Americas         |
| Apiaceae               | <i>Sium ninsi</i> Thunb.                                   | Asia             |
| Caricaceae             | <i>Jarilla chocola</i> Standl.                             | Americas         |
| Brassicaceae           | <i>Armoracia sisymbrioides</i> (DC.) N.Busch ex Ganesh     | Europe to C Asia |
| Tropaeolaceae          | <i>Tropaeolum patagonicum</i> Speng.                       | Americas         |
| Tropaeolaceae          | <i>Tropaeolum leptophyllum</i> G.Don                       | Americas         |
| Cucurbitaceae          | <i>Bolbostemma paniculatum</i> (Maxim.) Franquet           | Asia             |
| Icacinaeae             | <i>Icacina oliviformis</i> (Poir.) J.Raynal                | Africa           |
| Convolvulaceae         | <i>Merremia mammosa</i> (Lour.) Hallier f.                 | Asia             |

|               |                                                            |              |
|---------------|------------------------------------------------------------|--------------|
| Martyniaceae  | <i>Craniolaria annua</i> L.                                | Americas     |
| Lamiaceae     | <i>Orthosiphon rubicundus</i> (D.Don) Benth.               | Africa       |
| Campanulaceae | <i>Adenophora pereskiiifolia</i> (Fisch. ex Schult.) G.Don | Asia         |
| Dioscoreaceae | <i>Dioscorea ovata</i> Vell.                               | Americas     |
| Dioscoreaceae | <i>Dioscorea delicata</i> R.Knuth                          | Americas     |
| Dioscoreaceae | <i>Dioscorea arcuatinervis</i> Hochr.                      | Africa       |
| Dioscoreaceae | <i>Dioscorea altissima</i> Lam.                            | Americas     |
| Dioscoreaceae | <i>Dioscorea ovinata</i> Baker                             | Africa       |
| Dioscoreaceae | <i>Dioscorea convolvulacea</i> Cham. & Schltdl.            | Americas     |
| Dioscoreaceae | <i>Dioscorea subhastata</i> Vell.                          | Americas     |
| Dioscoreaceae | <i>Dioscorea seriflora</i> Jum. & H.Perrier                | Africa       |
| Dioscoreaceae | <i>Dioscorea cumingii</i> Prain & Burkill                  | Asia         |
| Dioscoreaceae | <i>Dioscorea kamoensis</i> Kunth                           | Asia         |
| Dioscoreaceae | <i>Dioscorea flabellifolia</i> Prain & Burkill             | Asia         |
| Dioscoreaceae | <i>Dioscorea densiflora</i> Hemsl.                         | Americas     |
| Dioscoreaceae | <i>Dioscorea debilis</i> Uline ex R.Knuth                  | Americas     |
| Dioscoreaceae | <i>Dioscorea heptaneura</i> Vell.                          | Americas     |
| Dioscoreaceae | <i>Dioscorea hastata</i> Mill.                             | Americas     |
| Dioscoreaceae | <i>Dioscorea olfersiana</i> Klotzsch ex Griseb.            | Americas     |
| Dioscoreaceae | <i>Dioscorea amazonum</i> Mart. ex Griseb.                 | Americas     |
| Dioscoreaceae | <i>Dioscorea dodecaneura</i> Vell.                         | Americas     |
| Dioscoreaceae | <i>Dioscorea semperflorens</i> Uline                       | Africa       |
| Dioscoreaceae | <i>Dioscorea cavenensis</i> Lam.                           | Africa       |
| Dioscoreaceae | <i>Dioscorea cirrhosa</i> Lour.                            | Asia         |
| Dioscoreaceae | <i>Dioscorea divaricata</i> Blanco                         | Asia         |
| Dioscoreaceae | <i>Dioscorea hastifolia</i> Nees                           | Asia         |
| Dioscoreaceae | <i>Dioscorea minutiflora</i> Engl.                         | Africa       |
| Dioscoreaceae | <i>Dioscorea oryzetorum</i> Prain & Burkill                | Asia         |
| Dioscoreaceae | <i>Dioscorea owenii</i> Prain & Burkill                    | Asia         |
| Dioscoreaceae | <i>Dioscorea cayennensis</i> Lam.                          | Africa       |
| Dioscoreaceae | <i>Dioscorea sagittifolia</i> Pax                          | Africa       |
| Dioscoreaceae | <i>Dioscorea smilacifolia</i> De Wild. & T.Durand          | Africa       |
| Dioscoreaceae | <i>Dioscorea sublignosa</i> R.Knuth                        | Africa       |
| Dioscoreaceae | <i>Dioscorea wallichii</i> Hook.f.                         | Asia         |
| Dioscoreaceae | <i>Rajania cordata</i> L.                                  | Americas     |
| Dioscoreaceae | <i>Dioscorea cinnamomifolia</i> Hook.                      | Americas     |
| Liliaceae     | <i>Lilium leichtlinii</i> Hook.f.                          | Asia         |
| Marattiaceae  | <i>Ptisana salicina</i> (Sm.) Murdock                      | Asia         |
| Nymphaeaceae  | <i>Nymphaea pubescens</i> Willd.                           | Asia         |
| Araceae       | <i>Amorphophallus abyssinicus</i> (A.Rich.) N.E.Br.        | Africa       |
| Araceae       | <i>Amorphophallus albus</i> P.Y.Liu & J.F.Chen             | Asia         |
| Araceae       | <i>Amorphophallus muelleri</i> Blume                       | Asia         |
| Araceae       | <i>Amorphophallus prainii</i> Hook.f.                      | Asia         |
| Araceae       | <i>Xanthosoma striatipes</i> (Kunth & C.D.Bouché) Madison  | Americas     |
| Araceae       | <i>Xanthosoma belophyllum</i> (Willd.) Kunth               | Americas     |
| Araceae       | <i>Xanthosoma caracu</i> K.Koch & C.D.Bouché               | Americas     |
| Araceae       | <i>Xanthosoma poeppigii</i> Schott                         | Americas     |
| Araceae       | <i>Xanthosoma helleborifolium</i> (Jacq.) Schott           | Americas     |
| Araceae       | <i>Xanthosoma yucatanense</i> Engl.                        | Americas     |
| Araceae       | <i>Alocasia cucullata</i> (Lour.) G.Don                    | Asia         |
| Araceae       | <i>Spathicarpa hastifolia</i> Hook.                        | Americas     |
| Araceae       | <i>Typhonium roxburghii</i> Schott                         | Asia         |
| Araceae       | <i>Typhonium trilobatum</i> (L.) Schott                    | Wide ranging |

|               |                                                                    |              |
|---------------|--------------------------------------------------------------------|--------------|
| Araceae       | <i>Sauromatum venosum</i> (Dryand. ex Aiton) Kunth                 | Africa       |
| Araceae       | <i>Arisaema costatum</i> (Wall.) Mart.                             | Asia         |
| Araceae       | <i>Arisaema schimperianum</i> Schott                               | Africa       |
| Zingiberaceae | <i>Curcuma angustifolia</i> Roxb.                                  | Asia         |
| Zingiberaceae | <i>Curcuma pierreana</i> Gagnep.                                   | Asia         |
| Costaceae     | <i>Cheilocostus speciosus</i> (J.Koenig) C.D.Specht                | Asia         |
| Cannaceae     | <i>Canna paniculata</i> Ruiz & Pav.                                | Americas     |
| Marantaceae   | <i>Donax canniformis</i> (G.Forst.) K.Schum.                       | Wide ranging |
| Marantaceae   | <i>Ischnosiphon arouma</i> (Aubl.) Körn.                           | Americas     |
| Marantaceae   | <i>Maranta ruiziana</i> Körn.                                      | Americas     |
| Marantaceae   | <i>Sarante marcgravii</i> Pickel                                   | Americas     |
| Marantaceae   | <i>Stromanthe jacquinii</i> (Roem. & Schult.) H.A.Kenn. & Nicolson | Americas     |
| Cyperaceae    | <i>Cyperus maculatus</i> Boeckeler                                 | Africa       |
| Cyperaceae    | <i>Actinoscirpus grossus</i> (L.f.) Goetgh. & D.A.Simpson          | Asia         |
| Leguminosae   | <i>Flemingia procumbens</i> Roxb.                                  | Asia         |
