# Supplementary material
Source: MDPI journal article supplement (https://www.mdpi.com/2077-0472/8/7/112)
Supplement: s1 [file s1]

**Table S4.** Cultivated vegetable species with production data included and possibly included in FAOSTAT

| Name in FAOSTAT                   | Species covered                                                                                                                                                                                                                                                                                                                                                                                                                                                                                                                                                                            | Number of countries with official data in last 20 years |
|-----------------------------------|--------------------------------------------------------------------------------------------------------------------------------------------------------------------------------------------------------------------------------------------------------------------------------------------------------------------------------------------------------------------------------------------------------------------------------------------------------------------------------------------------------------------------------------------------------------------------------------------|---------------------------------------------------------|
| <b>Specific species covered</b>   |                                                                                                                                                                                                                                                                                                                                                                                                                                                                                                                                                                                            |                                                         |
| Tomatoes                          | <i>Solanum lycopersicum</i>                                                                                                                                                                                                                                                                                                                                                                                                                                                                                                                                                                | 163                                                     |
| Potatoes                          | <i>Solanum tuberosum</i>                                                                                                                                                                                                                                                                                                                                                                                                                                                                                                                                                                   | 156                                                     |
| Onions                            | <i>Allium cepa</i>                                                                                                                                                                                                                                                                                                                                                                                                                                                                                                                                                                         | 146 <sup>a</sup>                                        |
| Sweet potatoes                    | <i>Ipomoea batatas</i>                                                                                                                                                                                                                                                                                                                                                                                                                                                                                                                                                                     | 100                                                     |
| Garlic                            | <i>Allium sativum</i>                                                                                                                                                                                                                                                                                                                                                                                                                                                                                                                                                                      | 97 <sup>b</sup>                                         |
| Soybeans                          | <i>Glycine max</i>                                                                                                                                                                                                                                                                                                                                                                                                                                                                                                                                                                         | 91                                                      |
| Cassava; Cassava Leaves           | <i>Manihot esculenta</i>                                                                                                                                                                                                                                                                                                                                                                                                                                                                                                                                                                   | 87                                                      |
| Cauliflowers and broccoli         | <i>Brassica oleracea</i>                                                                                                                                                                                                                                                                                                                                                                                                                                                                                                                                                                   | 86 <sup>c</sup>                                         |
| Peas, green                       | <i>Pisum sativum</i>                                                                                                                                                                                                                                                                                                                                                                                                                                                                                                                                                                       | 80                                                      |
| Eggplants (aubergines)            | <i>Solanum melongena</i>                                                                                                                                                                                                                                                                                                                                                                                                                                                                                                                                                                   | 79                                                      |
| Pineapples                        | <i>Ananas comosus</i>                                                                                                                                                                                                                                                                                                                                                                                                                                                                                                                                                                      | 75                                                      |
| Spinach                           | <i>Spinacia oleracea</i>                                                                                                                                                                                                                                                                                                                                                                                                                                                                                                                                                                   | 59                                                      |
| Lentils                           | <i>Lens culinaris</i> Medik.                                                                                                                                                                                                                                                                                                                                                                                                                                                                                                                                                               | 47                                                      |
| Okra                              | <i>Abelmoschus esculentus</i>                                                                                                                                                                                                                                                                                                                                                                                                                                                                                                                                                              | 45                                                      |
| Asparagus                         | <i>Asparagus officinalis</i>                                                                                                                                                                                                                                                                                                                                                                                                                                                                                                                                                               | 36                                                      |
| Ginger                            | <i>Zingiber officinale</i>                                                                                                                                                                                                                                                                                                                                                                                                                                                                                                                                                                 | 31                                                      |
| Hops                              | <i>Humulus lupulus</i>                                                                                                                                                                                                                                                                                                                                                                                                                                                                                                                                                                     | 29                                                      |
| Artichokes                        | <i>Cynara cardunculus</i>                                                                                                                                                                                                                                                                                                                                                                                                                                                                                                                                                                  | 21                                                      |
| Pigeon peas                       | <i>Cajanus cajan</i>                                                                                                                                                                                                                                                                                                                                                                                                                                                                                                                                                                       | 21                                                      |
| Bambara beans                     | <i>Vigna subterranea</i>                                                                                                                                                                                                                                                                                                                                                                                                                                                                                                                                                                   | 5                                                       |
| Quinoa                            | <i>Chenopodium quinoa</i>                                                                                                                                                                                                                                                                                                                                                                                                                                                                                                                                                                  | 3                                                       |
| <b>Multiple species groupings</b> |                                                                                                                                                                                                                                                                                                                                                                                                                                                                                                                                                                                            |                                                         |
| Cabbages and other brassicas      | <i>Brassica oleracea</i> <sup>c</sup> ; <i>B. rapa</i> ; <i>B. juncea</i> ; <i>B. napus</i> ; <i>B. carinata</i> ; <i>B. nigra</i>                                                                                                                                                                                                                                                                                                                                                                                                                                                         | 143 <sup>c</sup>                                        |
| Carrots and turnips               | <i>Daucus carota</i> ; <i>Brassica rapa</i>                                                                                                                                                                                                                                                                                                                                                                                                                                                                                                                                                | 126 <sup>c</sup>                                        |
| Cucumbers and gherkins            | <i>Cucumis sativus</i> ; <i>Cucumis anguria</i>                                                                                                                                                                                                                                                                                                                                                                                                                                                                                                                                            | 122                                                     |
| Chillies and peppers              | <i>Capsicum pubescens</i> ; <i>C. annum</i> ; <i>C. chinense</i> ; <i>C. baccatum</i>                                                                                                                                                                                                                                                                                                                                                                                                                                                                                                      | 115 (29) <sup>d</sup>                                   |
| Plantains and others; Bananas     | <i>Musa x paradisiaca</i> ; <i>M. acuminata</i> ; <i>M. balbisiana</i> ; <i>M. salaccensis</i> ; <i>M. troglodytarum</i>                                                                                                                                                                                                                                                                                                                                                                                                                                                                   | 113 <sup>e</sup>                                        |
| Pumpkins, squash and gourds       | <i>Cucurbita ficifolia</i> ; <i>C. maxima</i> ; <i>C. moschata</i> ; <i>C. pepo</i> ; <i>C. foetidissima</i> ; <i>Lagenaria siceraria</i>                                                                                                                                                                                                                                                                                                                                                                                                                                                  | 99                                                      |
| Lettuce and chicory               | <i>Lactuca sativa</i> ; <i>L. indica</i> ; <i>L. serriola</i> ; <i>L. perennis</i> ; <i>Cichorium intybus</i> <sup>f</sup> ; <i>C. endivia</i> <sup>f</sup>                                                                                                                                                                                                                                                                                                                                                                                                                                | 93 <sup>f</sup>                                         |
| Beans, green; String beans        | <i>Phaseolus vulgaris</i> ; <i>Phaseolus coccineus</i> ; <i>Vigna unguiculata</i> ; <i>Lablab purpureus</i>                                                                                                                                                                                                                                                                                                                                                                                                                                                                                | 93                                                      |
| Papayas                           | <i>Carica monoica</i> ; <i>C. papaya</i>                                                                                                                                                                                                                                                                                                                                                                                                                                                                                                                                                   | 52                                                      |
| Yams                              | <i>Dioscorea ovata</i> ; <i>D. delicata</i> ; <i>D. soso</i> ; <i>D. arcuatinervis</i> ; <i>D. altissima</i> ; <i>D. sansibarensis</i> ; <i>D. bulbifera</i> ; <i>D. ovinata</i> ; <i>D. convolvulacea</i> ; <i>D. subhastata</i> ; <i>D. seriflora</i> ; <i>D. dumetorum</i> ; <i>D. hispida</i> ; <i>D. quartiniana</i> ; <i>D. cumingii</i> ; <i>D. kamoonsensis</i> ; <i>D. pentaphylla</i> ; <i>D. trifida</i> ; <i>D. esculenta</i> ; <i>D. flabellifolia</i> ; <i>D. densiflora</i> ; <i>D. preussii</i> ; <i>D. debilis</i> ; <i>D. heptaneura</i> ; <i>D. hastata</i> ; <i>D.</i> | 47                                                      |

|                                      |                                                                                                                                                                                                                                                                                                                                                                                                                                                                                                                                                                                                                                                                                               |                 |
|--------------------------------------|-----------------------------------------------------------------------------------------------------------------------------------------------------------------------------------------------------------------------------------------------------------------------------------------------------------------------------------------------------------------------------------------------------------------------------------------------------------------------------------------------------------------------------------------------------------------------------------------------------------------------------------------------------------------------------------------------|-----------------|
|                                      | <i>olfersiana</i> ; <i>D. amazonum</i> ; <i>D. dodecaneura</i> ; <i>D. hirtiflora</i> ; <i>D. schimperiana</i> ; <i>D. semperflorens</i> ; <i>D. abyssinica</i> ; <i>D. alata</i> ; <i>D. burkilliana</i> ; <i>D. cavenensis</i> ; <i>D. cirrhosa</i> ; <i>D. divaricata</i> ; <i>D. hamiltonii</i> ; <i>D. hastifolia</i> ; <i>D. mangenotiana</i> ; <i>D. minutiflora</i> ; <i>D. nummularia</i> ; <i>D. oppositifolia</i> ; <i>D. oryzetorum</i> ; <i>D. owenii</i> ; <i>D. praehensilis</i> ; <i>D. cayennensis</i> ; <i>D. sagittifolia</i> ; <i>D. smilacifolia</i> ; <i>D. subligiosa</i> ; <i>D. transversa</i> ; <i>D. wallichii</i> ; <i>D. cinnamomifolia</i> ; <i>D. communis</i> |                 |
| Leeks, other alliaceous vegetables** | <i>Allium ampeloprasum</i> ; <i>A. sativum</i> <sup>b</sup> ; <i>A. cepa</i> <sup>b</sup> ; <i>A. x proliferum</i> ; <i>A. wallichii</i> ; <i>A. victoralis</i> ; <i>A. vavilovii</i> ; <i>A. ursinum</i> ; <i>A. stipitatum</i> ; <i>A. scorodoprasum</i> ; <i>A. schoenoprasum</i> ; <i>A. ramosum</i> ; <i>A. pskemense</i> ; <i>A. praemixtum</i> ; <i>A. oschaninii</i> ; <i>A. obliquum</i> ; <i>A. nutans</i> ; <i>A. neapolitanum</i> ; <i>A. macrostemon</i> ; <i>A. longifolium</i> ; <i>A. hookeri</i> ; <i>A. fistulosum</i> ; <i>A. consanguineum</i> ; <i>A. chinense</i> ; <i>A. canadense</i> ; <i>A. altaicum</i> ;                                                          | 40 <sup>b</sup> |
| Taro (cocoyam) +<br>Yautia (cocoyam) | <i>Colocasia esculenta</i> ; <i>C. fallax</i> ; <i>C. gigantea</i> ; <i>C. antiquorum</i> ; <i>Xanthosoma striatipes</i> ; <i>X. belophyllum</i> ; <i>X. caracu</i> ; <i>X. poeppigii</i> ; <i>X. robustum</i> ; <i>X. sagittifolium</i> ; <i>X. brasiliense</i> ; <i>X. helleborifolium</i> ; <i>X. yucatanense</i>                                                                                                                                                                                                                                                                                                                                                                          | 38              |
| Anise, badian, fennel, coriander     | <i>Pimpinella anisum</i> ; <i>Illicium verum</i> ; <i>Foeniculum vulgare</i> ; <i>Coriandrum sativum</i>                                                                                                                                                                                                                                                                                                                                                                                                                                                                                                                                                                                      | 18              |
| Chicory roots                        | <i>Cichorium intybus</i> ; <i>C. endivia</i>                                                                                                                                                                                                                                                                                                                                                                                                                                                                                                                                                                                                                                                  | 14 <sup>f</sup> |
| Jute                                 | <i>C. orchorus aestuans</i> ; <i>C. tridens</i> ; <i>C. olitorius</i> ; <i>C. capsularis</i> ; <i>C. trilobularis</i>                                                                                                                                                                                                                                                                                                                                                                                                                                                                                                                                                                         | 12              |

<sup>a</sup>. Entries for dry (43) and fresh onions (134) were present in FAOSTAT, the combination of countries with official data for these two entries (146) was entered in our database for *Allium cepa*;

<sup>b</sup>. Entries for garlic (97) and leeks and other alliaceous vegetables (40) were in FAOSTAT, the combination of countries with official data for these two entries (110) is in our database for *Allium sativum*;

<sup>c</sup>. Three different entries for Brassicaceae were present in FAOSTAT: cauliflower and broccoli (86), cabbages and other brassicas (143) and carrots and turnips (126). In our database all brassicas are indicated as having official data from 143 countries, with the exception of turnips (151), for which the combination of countries with official data on Brassicaceae and carrots and turnips was counted. *Daucus carota* in our database is indicated as in FAOSTAT, with 126 countries having official data on production:

<sup>d</sup>. Entries for dry (29) and fresh chillies and peppers (115) were in FAOSTAT, the combination of countries with official data for these two entries is in our database (124) for all *Capsicum* spp.;

<sup>e</sup>. Entries for bananas (104) and plantains and others (113) were in FAOSTAT, since the latter group includes all banana species, 113 is indicated as the number of countries with official data for all the 5 species of *Musa* in our database.

<sup>f</sup>. Entries for chicory roots (14) and for lettuce and chicory (93) were in FAOSTAT, since the latter group includes the species of chicory, 93 is indicated as the number of countries with official data for all the 6 species of *Lactuca* spp. and *Cichorium* spp. in our database;
