# Supplementary material
Source: MDPI journal article supplement (https://www.mdpi.com/2077-0472/8/7/112)
Supplement: s1 [file s1]

**Table S5.** Cultivated vegetable species with substantial coverage by research, ex situ conservation and production data. Species in this list were well covered on at least two of the indicators of neglect included in this study: having at least 5,000 Google scholar records related to food, nutrition and vegetable uses in the past 20 years; covered by at least 1,000 accessions in world genebanks; and/or documented by at least one country in FAOSTAT either as a single species or grouping of species over the past 20 years.

| Family                           | Species                                     | Region of origin |
|----------------------------------|---------------------------------------------|------------------|
| <b>Fruit and seed vegetables</b> |                                             |                  |
| Cucurbitaceae                    | <i>Cucumis sativus</i> L.                   | Asia             |
| Cucurbitaceae                    | <i>Lagenaria siceraria</i> (Molina) Standl. | Wide ranging     |
| Cucurbitaceae                    | <i>Cucurbita maxima</i> Duchesne            | Americas         |
| Cucurbitaceae                    | <i>Cucurbita moschata</i> Duchesne          | Americas         |
| Solanaceae                       | <i>Solanum melongena</i> L.                 | Asia             |
| Solanaceae                       | <i>Capsicum annuum</i> L.                   | Americas         |
| Solanaceae                       | <i>Capsicum chinense</i> Jacq.              | Americas         |
| Leguminosae                      | <i>Phaseolus vulgaris</i> L.                | Americas         |
| Leguminosae                      | <i>Cajanus cajan</i> (L.) Millsp.           | Wide ranging     |
| Leguminosae                      | <i>Pisum sativum</i> L.                     | Wide ranging     |
| Solanaceae                       | <i>Solanum lycopersicum</i> L.              | Americas         |
| Leguminosae                      | <i>Leucaena leucocephala</i> (Lam.) de Wit  | Americas         |
| Leguminosae                      | <i>Vigna mungo</i> (L.) Hepper              | Asia             |
| Leguminosae                      | <i>Vicia faba</i> L.                        | Europe to C Asia |
| Caricaceae                       | <i>Carica papaya</i> L.                     | Americas         |
| Solanaceae                       | <i>Capsicum baccatum</i> L.                 | Americas         |
| Leguminosae                      | <i>Vigna subterranea</i> (L.) Verdc.        | Africa           |
| Leguminosae                      | <i>Phaseolus coccineus</i> L.               | Americas         |
| <b>Other vegetables</b>          |                                             |                  |
| Asparagaceae                     | <i>Asparagus officinalis</i> L.             | Europe to C Asia |
| Compositae                       | <i>Lactuca serriola</i> L.                  | Europe to C Asia |
| <b>Leafy vegetables</b>          |                                             |                  |
| Apiaceae                         | <i>Coriandrum sativum</i> L.                | Europe to C Asia |
| Apiaceae                         | <i>Foeniculum vulgare</i> Mill.             | Europe to C Asia |
| Brassicaceae                     | <i>Brassica juncea</i> (L.) Czern.          | Asia             |
| Brassicaceae                     | <i>Brassica carinata</i> A.Braun            | Africa           |
| Compositae                       | <i>Cichorium intybus</i> L.                 | Europe to C Asia |
| Compositae                       | <i>Lactuca sativa</i> L.                    | Europe to C Asia |
| Amaranthaceae                    | <i>Chenopodium quinoa</i> Willd.            | Americas         |
| Amaranthaceae                    | <i>Spinacia oleracea</i> L.                 | Asia             |
| Cannabaceae                      | <i>Humulus lupulus</i> L.                   | Europe to C Asia |
| Bromeliaceae                     | <i>Ananas comosus</i> (L.) Merr.            | Asia             |
| Leguminosae                      | <i>Vigna unguiculata</i> (L.) Walp.         | Wide ranging     |
| Euphorbiaceae                    | <i>Jatropha curcas</i> L.                   | Americas         |
| Brassicaceae                     | <i>Sinapis alba</i> L.                      | Europe to C Asia |
| Malvaceae                        | <i>Hibiscus sabdariffa</i> L.               | Africa           |
| Pedaliaceae                      | <i>Sesamum indicum</i> L.                   | Africa           |
| Polygonaceae                     | <i>Fagopyrum esculentum</i> Moench          | Asia             |
| Leguminosae                      | <i>Vigna radiata</i> (L.) R.Wilczek         | Wide ranging     |
| Leguminosae                      | <i>Trigonella foenum-graecum</i> L.         | Wide ranging     |
| Brassicaceae                     | <i>Brassica nigra</i> (L.) K.Koch           | Wide ranging     |
| Compositae                       | <i>Cynara cardunculus</i> L.                | Europe to C Asia |
| Malvaceae                        | <i>Corchorus capsularis</i> L.              | Europe to C Asia |

| <b>Multiuse vegetables</b> |                                                   |                  |
|----------------------------|---------------------------------------------------|------------------|
| Euphorbiaceae              | <i>Manihot esculenta</i> Crantz                   | Americas         |
| Brassicaceae               | <i>Brassica oleracea</i> L.                       | Europe to C Asia |
| Brassicaceae               | <i>Brassica rapa</i> L.                           | Wide ranging     |
| Brassicaceae               | <i>Brassica napus</i> L.                          | Europe to C Asia |
| Cucurbitaceae              | <i>Cucurbita pepo</i> L.                          | Americas         |
| Malvaceae                  | <i>Abelmoschus esculentus</i> (L.) Moench         | Asia             |
| Dioscoreaceae              | <i>Dioscorea alata</i> L.                         | Asia             |
| Amaryllidaceae             | <i>Allium sativum</i> L.                          | Europe to C Asia |
| Amaryllidaceae             | <i>Allium cepa</i> L.                             | Europe to C Asia |
| Leguminosae                | <i>Glycine max</i> (L.) Merr.                     | Asia             |
| Leguminosae                | <i>Lablab purpureus</i> (L.) Sweet                | Wide ranging     |
| Leguminosae                | <i>Lens culinaris</i> Medik.                      | Europe to C Asia |
| Euphorbiaceae              | <i>Ricinus communis</i> L.                        | Wide rang        |
| Apiaceae                   | <i>Apium graveolens</i> L.                        | Europe to C Asia |
| Apiaceae                   | <i>Petroselinum crispum</i> (Mill.) Fuss          | Europe to C Asia |
| Cucurbitaceae              | <i>Momordica charantia</i> L.                     | Asia             |
| Cucurbitaceae              | <i>Citrullus lanatus</i> (Thunb.) Matsum. & Nakai | Africa           |
| Malvaceae                  | <i>Hibiscus cannabinus</i> L.                     | Africa           |
| Compositae                 | <i>Carthamus tinctorius</i> L.                    | Europe to        |
| Compositae                 | <i>Helianthus annuus</i> L.                       | Americas         |
| Amaranthaceae              | <i>Beta vulgaris</i> L.                           | Europe to        |
| Leguminosae                | <i>Phaseolus lunatus</i> L.                       | Americas         |
| Leguminosae                | <i>Cicer arietinum</i> L.                         | Europe to        |
| Amaryllidaceae             | <i>Allium fistulosum</i> L.                       | Asia             |
| Musaceae                   | <i>Musa acuminata</i> Colla                       | Asia             |
| Zingiberaceae              | <i>Zingiber officinale</i> Roscoe                 | Asia             |
| Malvaceae                  | <i>Corchorus olitorius</i> L.                     | Americas         |
| <b>Root vegetables</b>     |                                                   |                  |
| Apiaceae                   | <i>Daucus carota</i> L.                           | Europe to C Asia |
| Solanaceae                 | <i>Solanum tuberosum</i> L.                       | Americas         |
| Convolvulaceae             | <i>Ipomoea batatas</i> (L.)                       | Americas         |
| Araceae                    | <i>Colocasia esculenta</i> (L.)                   | Asia             |
