# Supplementary material
Source: MDPI journal article supplement (https://www.mdpi.com/2077-0472/8/7/112)
Supplement: s1 [file s1]

**Table S2.** Cultivated vegetable species with very limited research attention related to food, vegetable or nutrition applications (1 to 10 Google scholar records)

| Family                           | Species                                                                   | Region of origin |
|----------------------------------|---------------------------------------------------------------------------|------------------|
| <b>Fruit and seed vegetables</b> |                                                                           |                  |
| Cucurbitaceae                    | <i>Trichosanthes pilosa</i> Lour.                                         | Asia             |
| Cucurbitaceae                    | <i>Praecitrullus fistulosus</i> (Stocks) Pangalo                          | Asia             |
| Rutaceae                         | <i>Citrus lucida</i> (Scheff.) Mabb.                                      | Asia             |
| Leguminosae                      | <i>Parkia intermedia</i> Hassk.                                           | Asia             |
| Leguminosae                      | <i>Leucaena confertiflora</i> Zarate                                      | Americas         |
| Leguminosae                      | <i>Inga ilta</i> T.D.Penn.                                                | Americas         |
| Leguminosae                      | <i>Canavalia macrobotrys</i> Merr.                                        | Asia             |
| <b>Other vegetables</b>          |                                                                           |                  |
| Acanthaceae                      | <i>Dicliptera falcate</i> (Lam.) Bosser & Heine                           | Asia             |
| Compositae                       | <i>Philoglossa peruviana</i> DC.                                          | Americas         |
| Commelinaceae                    | <i>Belosynapsis moluccana</i> (Roxb.) C.E.C.Fisch.                        | Asia             |
| Leguminosae                      | <i>Senna versicolor</i> (Vogel) H.S.Irwin & Barneby                       | Americas         |
| <b>Leafy vegetables</b>          |                                                                           |                  |
| Euphorbiaceae                    | <i>Plukenetia corniculata</i> Sm.                                         | Asia             |
| Araliaceae                       | <i>Polyscias verticillata</i> B.C.Stone                                   | Asia             |
| Apiaceae                         | <i>Pimpinella calycina</i> Maxim.                                         | Asia             |
| Clusiaceae                       | <i>Garcinia silybifolia</i> Pierre                                        | Asia             |
| Violaceae                        | <i>Viola arcuata</i> Blume                                                | Asia             |
| Capparaceae                      | <i>Cleoserrata speciosa</i> (Raf.) Iltis                                  | Americas         |
| Malvaceae                        | <i>Hibiscus mechowii</i> Garcke                                           | Africa           |
| Primulaceae                      | <i>Maesa latifolia</i> A.DC.                                              | Asia             |
| Apocynaceae                      | <i>Hoya reticulata</i> Moon                                               | Asia             |
| Convolvulaceae                   | <i>Ipomoea pileata</i> Roxb.                                              | Africa           |
| Acanthaceae                      | <i>Pseuderanthemum racemosum</i> Radlk.                                   | Asia             |
| Lamiaceae                        | <i>Plectranthus monostachyus</i> (P.Beauv.) B.J.Pollard                   | Africa           |
| Pentaphragmataceae               | <i>Pentaphragma begoniifolia</i> Wall. ex G. Don                          | Asia             |
| Compositae                       | <i>Baccharoides calvoana</i> (Hook.f.) \Isawumi,                          | Africa           |
| Compositae                       | <i>Gymnanthemum theophrastifolium</i> (Schweinf. ex Oliv. & Hiern) H.Rob. | Africa           |
| Compositae                       | <i>Ligularia splendens</i> (H.Lév. & Vaniot) Nakai                        | Asia             |
| Compositae                       | <i>Gynura amplexicaulis</i> Oliv. & Hiern                                 | Africa           |
| Anacardiaceae                    | <i>Semecarpus cassuvium</i> Roxb.                                         | Asia             |
| Cyatheaceae                      | <i>Cyathea angiensis</i> (A. Gepp) Domin                                  | Asia             |
| Piperaceae                       | <i>Peperomia pereskiifolia</i> (Jacq.) Kunth                              | Americas         |
| Polygonaceae                     | <i>Persicaria pulchra</i> (Blume) Soják                                   | Wide ranging     |
| Polygonaceae                     | <i>Fagopyrum kashmirianum</i> Munshi                                      | Asia             |
| Orchidaceae                      | <i>Chloraea piquichen</i> (Lam.) Lindl.                                   | Asia             |
| Araceae                          | <i>Spathiphyllum commutatum</i> Schott                                    | Asia             |
| Zingiberaceae                    | <i>Riedelia corallina</i> (K.Schum.) Valetton                             | Asia             |
| Leguminosae                      | <i>Hylodesmum repandum</i> (Vahl) H.Ohashi & R.R.Mill                     | Wide ranging     |
| Leguminosae                      | <i>Nesphostylis bracteata</i> (Baker) D.Potter & J.J.Doyle                | Asia             |
| <b>Multiuse vegetables</b>       |                                                                           |                  |
| Amaryllidaceae                   | <i>Allium longifolium</i> (Kunth) Spreng.                                 | Asia             |
| Araceae                          | <i>Amorphophallus kachinensis</i> Engl. & Gehrm.                          | Asia             |
| Araceae                          | <i>Amorphophallus harmandii</i> Engl. & Gehrm.                            | Asia             |
| Araceae                          | <i>Amorphophallus yuloensis</i> H.Li                                      | Asia             |

|                        |                                                           |                     |
|------------------------|-----------------------------------------------------------|---------------------|
| Leguminosae            | <i>Psophocarpus grandifloras</i> R.Wilczek                | Africa              |
| Leguminosae            | <i>Sphenostylis erecta</i> (Baker f.) Hutch. ex Baker f.  | Africa              |
| Leguminosae            | <i>Flemingia tuberosa</i> Dalzell                         | Asia                |
| <b>Root vegetables</b> |                                                           |                     |
| Euphorbiaceae          | <i>Manihot brachyandra</i> Pax & K.Hoffm.                 | Americas            |
| Tropaeolaceae          | <i>Tropaeolum patagonicum</i> Speg.                       | Americas            |
| Tropaeolaceae          | <i>Tropaeolum leptophyllum</i> G.Don                      | Americas            |
| Dioscoreaceae          | <i>Dioscorea ovata</i> Vell.                              | Americas            |
| Dioscoreaceae          | <i>Dioscorea delicata</i> R.Knuth                         | Americas            |
| Dioscoreaceae          | <i>Dioscorea soso</i> Jum. & H.Perrier                    | Africa              |
| Dioscoreaceae          | <i>Dioscorea arcuatinervis</i> Hochr.                     | Africa              |
| Dioscoreaceae          | <i>Dioscorea ovinata</i> Baker                            | Africa              |
| Dioscoreaceae          | <i>Dioscorea subhastata</i> Vell.                         | Americas            |
| Dioscoreaceae          | <i>Dioscorea seriflora</i> Jum. & H.Perrier               | Africa              |
| Dioscoreaceae          | <i>Dioscorea cumingii</i> Prain & Burkill                 | Asia                |
| Dioscoreaceae          | <i>Dioscorea flabellifolia</i> Prain & Burkill            | Asia                |
| Dioscoreaceae          | <i>Dioscorea densiflora</i> Hemsl.                        | Americas            |
| Dioscoreaceae          | <i>Dioscorea debilis</i> Uline ex R.Knuth                 | Americas            |
| Dioscoreaceae          | <i>Dioscorea heptaneura</i> Vell.                         | Americas            |
| Dioscoreaceae          | <i>Dioscorea hastata</i> Mill.                            | Americas            |
| Dioscoreaceae          | <i>Dioscorea amazonum</i> Mart. ex Griseb.                | Americas            |
| Dioscoreaceae          | <i>Dioscorea cavenensis</i> Lam.                          | Africa              |
| Dioscoreaceae          | <i>Dioscorea divaricata</i> Blanco                        | Asia                |
| Dioscoreaceae          | <i>Dioscorea oryzetorum</i> Prain & Burkill               | Asia                |
| Dioscoreaceae          | <i>Dioscorea owenii</i> Prain & Burkill                   | Asia                |
| Dioscoreaceae          | <i>Dioscorea sublignosa</i> R.Knuth                       | Africa              |
| Dioscoreaceae          | <i>Dioscorea cinnamomifolia</i> Hook.                     | Americas            |
| Amaryllidaceae         | <i>Allium praemixtum</i> Vved.                            | Europe to<br>C Asia |
| Araceae                | <i>Amorphophallus prainii</i> Hook.f.                     | Asia                |
| Araceae                | <i>Xanthosoma striatipes</i> (Kunth & C.D.Bouché) Madison | Americas            |
| Araceae                | <i>Xanthosoma belophyllum</i> (Willd.) Kunth              | Americas            |
| Marantaceae            | <i>Sarantia marcgravii</i> Pickel                         | Americas            |
