# Supplementary material
Source: MDPI journal article supplement (https://www.mdpi.com/2077-0472/8/7/112)
Supplement: s1 [file s1]

**Table S6.** Cultivated vegetable species documented in EcoCrop with capacity to produce on low quality soils with 300 mm of rain or less. Only 29% of cultivated vegetables were included in the database.

| Family                                  | Species                                    | Region of origin |
|-----------------------------------------|--------------------------------------------|------------------|
| <b><i>Fruit and seed vegetables</i></b> |                                            |                  |
| Cucurbitaceae                           | <i>Cucurbita moschata</i> Duchesne         | Americas         |
| Leguminosae                             | <i>Cordeauxia edulis</i> Hemsl.            | Africa           |
| Leguminosae                             | <i>Ceratonia siliqua</i> L.                | Europe to C Asia |
| Leguminosae                             | <i>Parkia biglobosa</i> (Jacq.) G.Don      | Africa           |
| Leguminosae                             | <i>Leucaena leucocephala</i> (Lam.) de Wit | Americas         |
| Leguminosae                             | <i>Vigna subterranea</i> (L.) Verdc.       | Africa           |
| Leguminosae                             | <i>Phaseolus vulgaris</i> L.               | Americas         |
| Leguminosae                             | <i>Lotus edulis</i> L.                     | Europe to C Asia |
| Cucurbitaceae                           | <i>Cucurbita moschata</i> Duchesne         | Americas         |
| Leguminosae                             | <i>Cordeauxia edulis</i> Hemsl.            | Africa           |
| Leguminosae                             | <i>Ceratonia siliqua</i> L.                | Europe to C Asia |
| Leguminosae                             | <i>Parkia biglobosa</i> (Jacq.) G.Don      | Africa           |
| Leguminosae                             | <i>Leucaena leucocephala</i> (Lam.) de Wit | Americas         |
| Leguminosae                             | <i>Vigna subterranea</i> (L.) Verdc.       | Africa           |
| Leguminosae                             | <i>Phaseolus vulgaris</i> L.               | Americas         |
| Leguminosae                             | <i>Lotus edulis</i> L.                     | Europe to C Asia |
| <b><i>Leafy vegetables</i></b>          |                                            |                  |
| Euphorbiaceae                           | <i>Jatropha curcas</i> L.                  | Americas         |
| Brassicaceae                            | <i>Nasturtium officinale</i> R.Br.         | Europe to C Asia |
| Brassicaceae                            | <i>Brassica nigra</i> (L.) K.Koch          | Wide ranging     |
| Brassicaceae                            | <i>Eruca vesicaria</i> (L.) Cav.           | Wide ranging     |
| Malvaceae                               | <i>Adansonia digitata</i> L.               | Africa           |
| Solanaceae                              | <i>Lycium chinense</i> Mill.               | Asia             |
| Pedaliaceae                             | <i>Sesamum indicum</i> L.                  | Africa           |
| Compositae                              | <i>Calendula officinalis</i> L.            | Europe to C Asia |
| Amaryllidaceae                          | <i>Allium schoenoprasum</i> L.             | Wide ranging     |
| Cactaceae                               | <i>Opuntia ficus-indica</i> (L.) Mill.     | Americas         |
| Amaranthaceae                           | <i>Chenopodium quinoa</i> Willd.           | Americas         |
| Amaranthaceae                           | <i>Chenopodium pallidicaule</i> Aellen     | Americas         |
| Amaranthaceae                           | <i>Atriplex hortensis</i> L.               | Europe to C Asia |
| Amaranthaceae                           | <i>Atriplex halimus</i> L.                 | Wide ranging     |
| Amaranthaceae                           | <i>Amaranthus caudatus</i> L.              | Americas         |
| Amaranthaceae                           | <i>Amaranthus hybridus</i> L.              | Americas         |
| Moraceae                                | <i>Ficus elastica</i> Roxb. ex Hornem.     | Asia             |
| Rosaceae                                | <i>Sanguisorba minor</i> Scop.             | Europe to C Asia |
| Leguminosae                             | <i>Vigna unguiculata</i> (L.) Walp.        | Wide ranging     |
| <b><i>Multiuse vegetables</i></b>       |                                            |                  |
| Apiaceae                                | <i>Petroselinum crispum</i> (Mill.) Fuss   | Europe to C Asia |
| Capparaceae                             | <i>Capparis spinosa</i> L.                 | Europe to C Asia |
| Brassicaceae                            | <i>Brassica oleracea</i> L.                | Europe to C Asia |
| Cucurbitaceae                           | <i>Luffa cylindrica</i> (L.) M.Roem.       | Europe to C Asia |
| Cucurbitaceae                           | <i>Cucurbita pepo</i> L.                   | Americas         |
| Boraginaceae                            | <i>Borago officinalis</i> L.               | Europe to C Asia |
| Compositae                              | <i>Carthamus tinctorius</i> L.             | Europe to C Asia |
| Compositae                              | <i>Helianthus annuus</i> L.                | Americas         |
| Amaryllidaceae                          | <i>Allium cepa</i> L.                      | Europe to C Asia |
| Zygophyllaceae                          | <i>Balanites aegyptiaca</i> (L.) Delile    | Africa           |

|                        |                                                  |                  |
|------------------------|--------------------------------------------------|------------------|
| Typhaceae              | <i>Typha latifolia</i> L.                        | Wide ranging     |
| Arecaceae              | <i>Hyphaene thebaica</i> (L.) Mart.              | Africa           |
| Leguminosae            | <i>Tamarindus indica</i> L.                      | Wide ranging     |
| Leguminosae            | <i>Prosopis juliflora</i> (Sw.) DC.              | Americas         |
| Leguminosae            | <i>Lablab purpureus</i> (L.) Sweet               | Wide ranging     |
| Leguminosae            | <i>Vigna umbellata</i> (Thunb.) Ohwi & H. Ohashi | Asia             |
| Leguminosae            | <i>Lens culinaris</i> Medik.                     | Europe to C Asia |
| Leguminosae            | <i>Cicer arietinum</i> L.                        | Europe to C Asia |
| <b>Root vegetables</b> |                                                  |                  |
| Solanaceae             | <i>Solanum tuberosum</i> L.                      | Americas         |
| Cyperaceae             | <i>Cyperus esculentus</i> L.                     | Wide ranging     |
| Cyperaceae             | <i>Cyperus rotundus</i> L.                       | Wide ranging     |
| Leguminosae            | <i>Tylosema esculentum</i> (Burch.) A. Schreib.  | Africa           |
| Leguminosae            | <i>Pachyrhizus erosus</i> (L.) Urb.              | Americas         |
